# Supplementary material for: Lanthanide-doped mesoporous MCM-41 nanoparticles as a novel optical–magnetic multifunctional nanobioprobe
Source: Royal Society of Chemistry journal article supplement (doi:10.1039/c9ra08116j), 2019-01-01
Supplement: c9ra08116j1.pdf [file c9ra08116j1.pdf]

## Supporting Information

### **Lanthanide-doped mesoporous MCM-41 nanoparticles as a novel optical-magnetic multifunctional nanobioprobes**

Jun Liu<sup>a, b, \*</sup>, Siqian Liu<sup>a</sup>, Yaling Li<sup>a</sup>, Jiayan Xue<sup>a</sup>, Youyi He<sup>a</sup>, Fuchi Liu<sup>a</sup>, Li Yang<sup>a</sup>, Junhui Hu<sup>a</sup>, Zhengye Xiong<sup>c, \*</sup>, Lizhen Long<sup>a, \*</sup>

<sup>a</sup> College of Physics Science and Technology & Guangxi Key Laboratory of Nuclear Physics and Technology, Guangxi Normal University, Guilin 541004, P.R. China.

<sup>b</sup> State Key Laboratory for Chemistry and Molecular Engineering of Medicinal Resources, Guilin 541004, P. R. China

<sup>c</sup> School of Electronics and Information Engineering, Guangdong Ocean University, Zhanjiang 524088, China

\* Corresponding authors. E-mail: liujun719@163.com (J. L); xiongzhenye@139.com (Z. X); longlzh@foxmail.com (L. L). Tel./Fax.: +86-0773-5846479.

## 1. Synthesis of the nanoparticles.

0.2 g of cetyltrimethylammonium bromide (C<sub>16</sub>TAB) and 0.505g polyethylene glycol (PEG) was dissolved in 100 ml of distilled water. 2 ml of 25% NH<sub>3</sub>·H<sub>2</sub>O was then added to the vigorously stirred solution at room temperature, followed by the addition of 1 ml tetraethoxysilane (TEOS), and 0, 2, and 4 ml of Ln(NO<sub>3</sub>)<sub>3</sub> solution (2.4 mM, contains 95% mol Gd(NO<sub>3</sub>)<sub>3</sub> and 5% mol Eu(NO<sub>3</sub>)<sub>3</sub>). After one hour of stirring, the fine particle precipitate was centrifuged and dried in a freezer dryer. Then, the samples were calcined at 500 °C for 5 h to remove the templates.

Table S1 Synthesis parameters for MCM-41, LLn-MCM-41, and HLn-MCM-41 nanoparticles.

| Samples    | Ln(NO <sub>3</sub> ) <sub>3</sub><br>(2.4 mM) | C <sub>16</sub> TAB | PEG    | NH <sub>3</sub> ·H <sub>2</sub> O | TEOS | Time |
|------------|-----------------------------------------------|---------------------|--------|-----------------------------------|------|------|
| MCM-41     | 0 ml                                          | 0.2 g               | 0.505g | 2 ml                              | 1 ml | 1 h  |
| LLn-MCM-41 | 2 ml                                          | 0.2 g               | 0.505g | 2 ml                              | 1 ml | 1 h  |
| HLn-MCM-41 | 4 ml                                          | 0.2 g               | 0.505g | 2 ml                              | 1 ml | 1 h  |

## 2. Multicolored Ln-MCM-41 fluorescence nanoparticles.

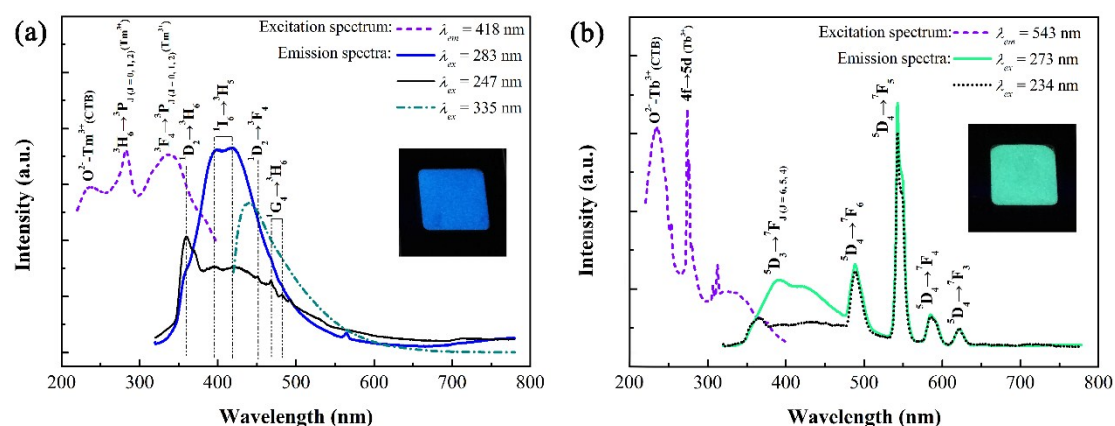

Figure S1 Room temperature photoluminescence excitation (PLE) and photoluminescence emission (PL) properties of the Ln-MCM-41 nanoparticles: (a) Ln = Gd/Tm and (b) Ln = Gd/Tb.

### 3. RT magnetization of the Ln-MCM-41 nanoparticles.

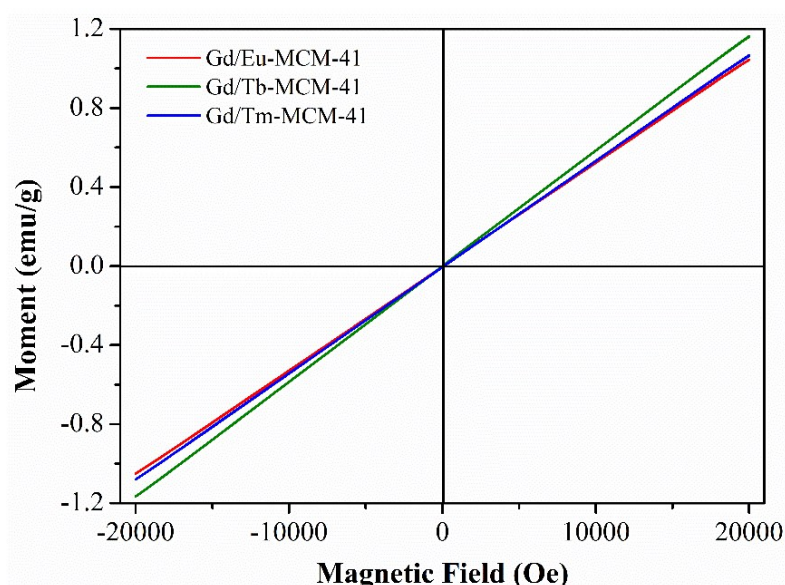

Figure S2 RT magnetization as a linear function of magnetic field for the Gd/Eu-MCM-41, Gd/Tb-MCM-41, and Gd/Tm-MCM-41 nanoparticles.

Table S2 Magnetization and applications of the reported Gd-based materials.

| Samples                                             | Magnetization at 300 K                 | Application   | Reference |
|-----------------------------------------------------|----------------------------------------|---------------|-----------|
| Gd-doped nanorods                                   | $\sim 0.3 \text{ emug}^{-1}$ at 10 kOe | MRI           | Ref. 1    |
| PEG-Gd <sub>2</sub> O <sub>3</sub> nanoparticles    | $0.75 \text{ emug}^{-1}$ at 15 kOe     | MRI           | Ref. 2    |
| Porous Gd <sub>2</sub> O <sub>3</sub> nanoparticles | $< 4 \text{ emug}^{-1}$ at 20 kOe      | MRI           | Ref. 3    |
| Silica-coated magnetite                             | $3.2 \text{ emug}^{-1}$ at 6 kOe       | Bioseparation | Ref. 4    |
| BaGdF <sub>5</sub> :Yb/Er nanoparticles             | $1.05 \text{ emug}^{-1}$ at 20 kOe     | MRI           | Ref. 5    |
| Ln-MCM-41 nanoparticles                             | $1.04 \text{ emug}^{-1}$ at 20 kOe     | /             | This work |

#### Ref.

- [1] F. Chen, P. Huang, Y.J. Zhu, J. Wu, C.L. Zhang, D.X. Cui, *Biomaterials*, 32 (2011) 9031-9039.
- [2] M.-A. Fortin, R.M. Petoral Jr, F. Söderlind, A. Klasson, M. Engström, T. Veres, P.-O. Käll, K. Uvdal, *Nanotechnology*, 18 (2007) 395501-395509.
- [3] C.-C. Huang, T.-Y. Liu, C.-H. Su, Y.-W. Lo, J.-H. Chen, C.-S. Yeh, *Chem. Mater.*, 20 (2008) 3840-3848.
- [4] H.H. Yang, S.Q. Zhang, X.L. Chen, Z.X. Zhuang, J.G. Xu, X.R. Wang, *Anal. Chem.* 2004,76, 1316.
- [5] S. Zeng, M.-K. Tsang, C.-F. Chan, K.-L. Wong, J. Hao, *Biomaterials*, 2012, 33, 9232-9238.

#### 4. Drug storage and release behaviors.

The UV-vis absorbance spectra of the PBS medium were measured after loading at different time. As shown in Fig. S3, the absorbance at 480 nm of PBS medium was closed to zero after loading at 2 h. This result indicated that the DOX were completely loaded in to the Ln-MCM-41 nanoparticles. Thus, it can be calculated that the loading amount of DOX-Ln-MCM-41 nanoparticles were about 0.06 mg of the DOX per mg of nanoparticles.

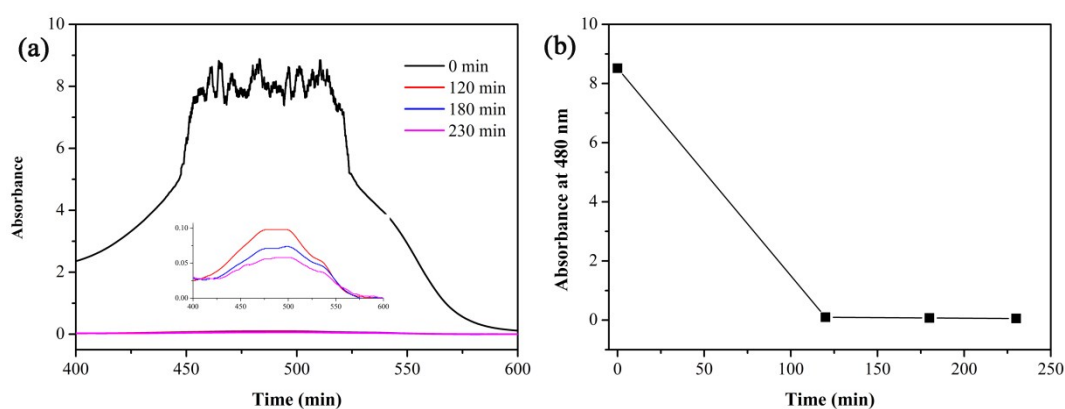

Fig. S3 UV-vis absorbance of the PBS medium after loading at different time

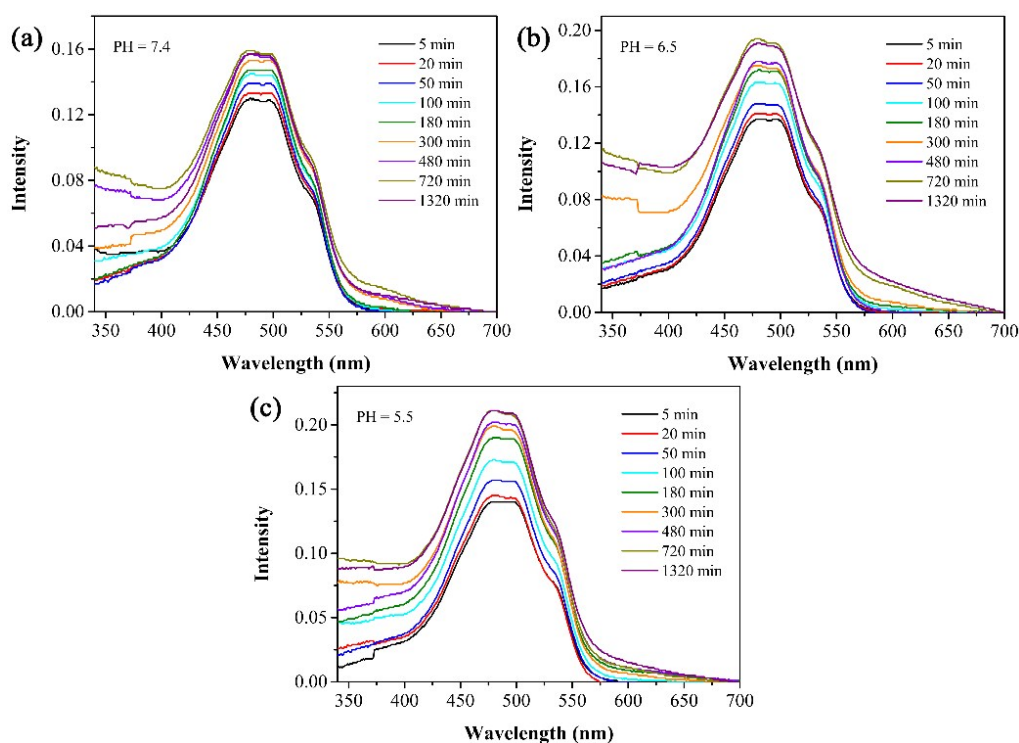

Figure S4 UV-vis absorbance spectra of the released PBS medium at predetermined time intervals: (a) pH =7.4; (b) pH =6.5; (c) pH =5.5.
